# Supplementary material
Source: Springer Nature journal article supplement (https://www.springermedizin.de/resource/supplementary/12963_2010_133_MOESM4_ESM.pdf/9572732)
Supplement: MOESM4 [file 9572732]

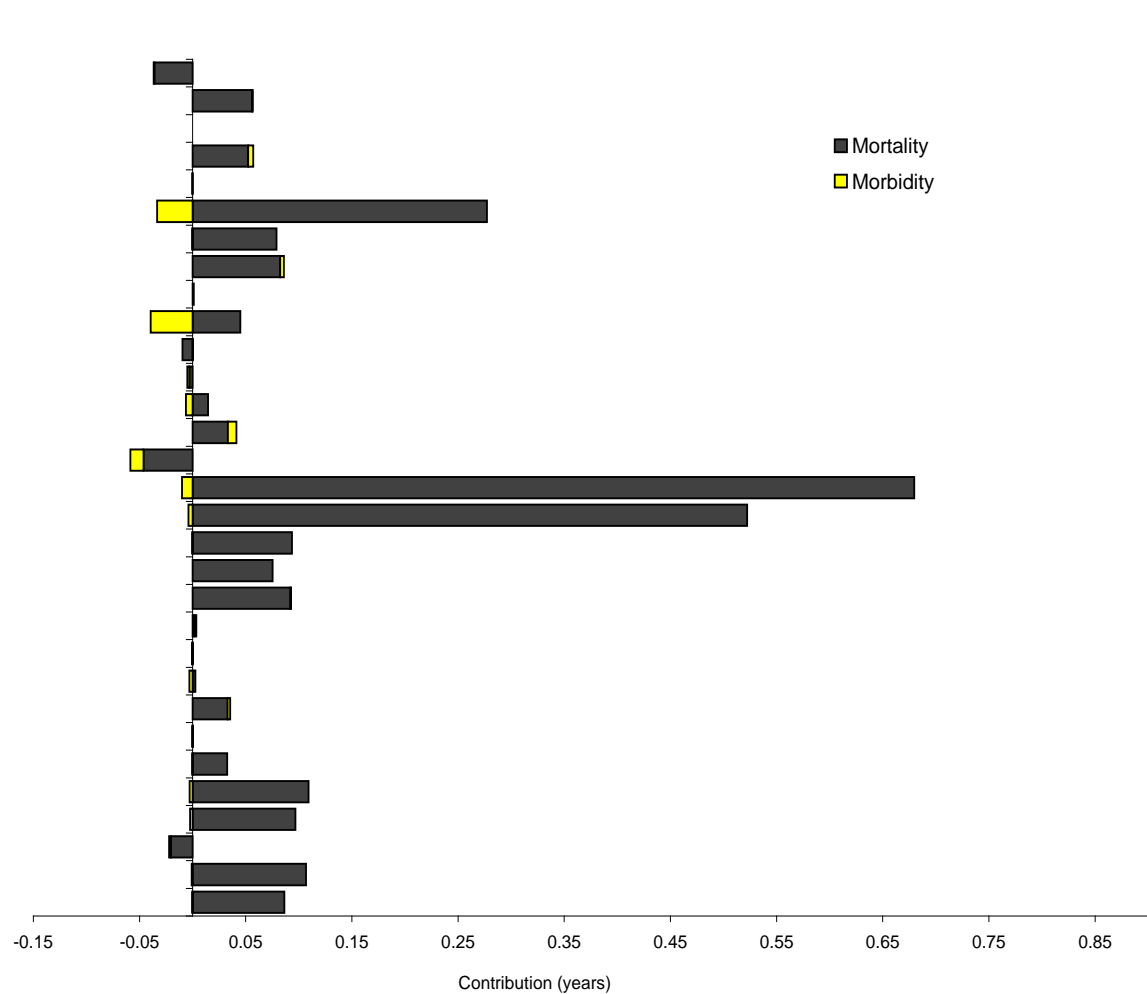

|                                   | Percent change |           | Total |
|-----------------------------------|----------------|-----------|-------|
|                                   | Mortality      | Morbidity |       |
| Infectious                        | -2.4           | 1.5       | -2.6  |
| Acute respiratory                 | 3.8            | -0.6      | 4.0   |
| Maternal                          | 0.0            | 0.0       | 0.0   |
| Neonatal                          | 3.6            | -8.8      | 4.0   |
| Nutritional                       | 0.0            | -0.2      | 0.0   |
| Cancer                            | 18.8           | 62.6      | 17.2  |
| Colorectal cancer                 | 5.4            | 0.3       | 5.6   |
| Lung cancer                       | 5.6            | -6.2      | 6.1   |
| Breast cancer                     | 0.1            | 0.0       | 0.1   |
| Prostate cancer                   | 3.1            | 74.0      | 0.4   |
| Other neoplasms                   | -0.7           | -0.3      | -0.7  |
| Diabetes                          | -0.2           | 3.5       | -0.3  |
| Endocrine                         | 1.0            | 11.7      | 0.6   |
| Mental                            | 2.3            | -14.9     | 2.9   |
| Neurological                      | -3.1           | 23.3      | -4.1  |
| Cardiovascular                    | 46.2           | 18.8      | 47.3  |
| Coronary heart disease            | 35.5           | 7.5       | 36.6  |
| Stroke                            | 6.4            | 0.6       | 6.6   |
| Chronic respiratory               | 5.1            | 0.2       | 5.3   |
| Digestive                         | 6.3            | -1.3      | 6.5   |
| Genitourinary                     | 0.1            | -3.3      | 0.2   |
| Skin                              | 0.0            | -0.6      | 0.0   |
| Musculoskeletal                   | 0.2            | 5.7       | 0.0   |
| Congenital                        | 2.2            | -4.5      | 2.5   |
| Oral                              | 0.0            | -0.4      | 0.0   |
| Ill defined syndromes             | 2.2            | 0.3       | 2.3   |
| Unintentional injuries            | 7.4            | 5.3       | 7.5   |
| Road traffic accidents            | 6.6            | 4.5       | 6.7   |
| Falls                             | -1.4           | 3.1       | -1.6  |
| Intentional injuries              | 7.3            | 1.8       | 7.5   |
| Suicide & self-inflicted injuries | 5.9            | 0.3       | 6.1   |
|                                   | 100.0          | 100.0     | 100.0 |
